1 CLASSIFICATION: Applied and Environmental Science, Microbiology

2

3 **Title: Antibiotic Resistance in *Bacillus*-based Biopesticide Products**

4 Running Title: Antibiotic Resistance in Biopesticides

5

6 AUTHORS: Mo Kaze<sup>A#</sup>, Lauren Brooks<sup>B</sup>, Mark Sstrom<sup>A</sup>

7

8 A) Department of Quantitative and Systems Biology, School of Natural Sciences, University of

9 California Merced, USA

10 B) Department of Biology, Utah Valley University, USA

11

12 # Corresponding author

13 Mo Kaze

14 UC Merced

15 5200 N Lake Rd

16 Merced, CA 95343

17 [mkaze@ucmerced.edu](mailto:mkaze@ucmerced.edu)

18 (415) 699-5255

19

20

21

22

23

24

25 KEYWORDS: Antibiotic Resistance, Genomics, *Bacillus*, Biopesticides

26 Abstract

27 The crisis of antibiotic resistant bacterial infections is one of the most pressing public health  
28 issues. Common agricultural practices have been implicated in the generation of antibiotic  
29 resistant bacteria. Biopesticides, live bacteria used for pest control, are non-pathogenic and  
30 considered safe for consumption. Application of bacteria-based pesticides to crops in high  
31 concentrations raises the possibility of unintentional contributions to the movement and  
32 generation of antibiotic resistance genes in the environment. However, the presence of clinically  
33 relevant antibiotic resistance genes and their resistance phenotypes are currently unknown. Here  
34 we use a combination of multiple bioinformatic and microbiological techniques to define  
35 resistomes of widely used biopesticides and determine how the presence of suspected antibiotic  
36 resistance genes translates to observable resistance phenotypes in several biopesticide products.  
37 Our results demonstrate that biopesticide products are reservoirs of clinically relevant antibiotic  
38 resistance genes and bear resistance to multiple drug classes.

39

40 Importance

41 This is the first study to specifically address antibiotic resistance in widely distributed bacterial  
42 strains used as commercial biopesticides. Safety assessments of commercial live bacterial  
43 biopesticide products do not include antibiotic resistance phenotype identification. We identify  
44 antibiotic resistance genes in all live bacterial strains examined, and resistant phenotypes in all  
45 strains tested for antibiotic susceptibility. This work demonstrates that biopesticides potentially  
46 play a critical role as reservoirs and vectors of antibiotic resistance in the broader environmental  
47 resistome that is to date, unstudied.

48

## 49 **Introduction**

50           The increasing prevalence of antibiotic resistant bacterial infections is one of the most pressing  
51 public health crises of the current era. Without significant efforts to curb antibiotic resistant infections,  
52 10 million human deaths per annum are estimated to occur by 2050 along with severe impacts to animal  
53 husbandry and subsequent food production.(1-2) A large body of research has investigated the spread of  
54 antibiotic resistance via common agricultural practices, implicating many in the generation of antibiotic  
55 resistant bacteria.(1-6) The widespread use and presence of antibiotic compounds in the broader  
56 environment, and the ubiquitous presence of genes encoding resistance to them, play a critical role in  
57 the evolutionary mechanisms affecting antibiotic resistance. Clinically relevant and nonclinical bacterial  
58 species residing in microorganismal communities horizontally transfer resistance genes. These  
59 exchanges subsequently influence the prevalence and patterns of antibiotic resistant infections.(7,8)

60           The use of microorganisms in agriculture for pest control, frost prevention, and rhizosphere  
61 enhancements has steadily increased over the last 20 years.(9,10) Considered safe for consumption,  
62 non-toxic, non-pathogenic and highly effective,(11–14) microbial products offer a welcome alternative  
63 to chemically synthesized pesticides known to cause damage to human health and the environment.(15,  
64 16) Microbes used as biopesticides are classified “Generally recognized as safe” (GRAS) by the US  
65 FDA(17) as they do not pose a threat to human health. However, these microorganisms have the  
66 potential to contribute to the pervasiveness of antibiotic resistance through genes encoded in bacterial  
67 genomes and mobile genetic elements. It is crucial to identify clinically relevant antibiotic resistance  
68 genes present in live bacterial biopesticides used in large scale applications to prevent unintentional  
69 contributions to the spread of antibiotic resistance genes and the expansion of antibiotic resistance gene  
70 reservoirs. There is an urgent need to understand the role biopesticides play in the transmission of  
71 antibiotic resistance genes and their roles as potential vectors.

72 *Bacillus*-based biopesticides are increasingly popular. *Bacillus thuringiensis* (Bt) is the most  
73 widely used biopesticide in industrial agriculture. Aerial Bt spraying has replaced aerial DDT, a known  
74 environmental toxin, for control of moths, blackflies, mosquitoes, and many other pests in forestry,  
75 agriculture, and urban areas.(18,19) Out of commercial *Bacillus*-based biopesticides, Bt is considered  
76 the safest, and has been in use globally for more than 80 years.(20) Bt is a Gram positive, aerobic, soil-  
77 dwelling bacteria characterized by the presence of plasmids containing *cry* and *cyt* genes.(21) These  
78 two toxin genes and their variations confer unique insecticidal properties. Bt is genetically plastic and  
79 has special capability regarding plasmid acceptance and maintenance. This biopesticide species has  
80 previously been shown to host as many as seventeen plasmids.(22)

81 This study represents the first effort to assess the potential role of live, commercial bacterial  
82 biopesticides as reservoirs of antibiotic resistance genes, and to connect antibiotic resistance phenotypes  
83 to resistance genotypes. We analyze four commercially available *Bacillus*-based biopesticide strains:  
84 two Bt kurstaki products, *B. amyloliquefaciens* D747, and *B. subtilis* QST 713, using a combination of  
85 bioinformatics and antibiotic susceptibility testing. We classify all antibiotic resistance genes in these  
86 *Bacillus*-based biopesticide products by comparing whole-genome sequenced products against the  
87 Comprehensive Antibiotic Resistance Database (CARD) and annotating sequenced genomes.(23) This  
88 work demonstrates that currently used commercial *Bacillus*-based biopesticides contain clinically  
89 relevant antibiotic resistance genes and bear resistance to multiple drug classes. These findings raise  
90 concern regarding potential vectors of unintended transmission of antibiotic resistance as they are  
91 introduced to the environment in large quantities.

92

93

94

## 95 **Methods**

96 A list of all *Bacillus*-based biopesticide species approved for use in the US was collated  
97 from databases published by the California Department of Pesticide Registration and United  
98 States Environmental Protection Agency databases.(24) In order to narrow down antibiotic  
99 selection, publicly available complete, whole reference genomes matching strain information  
100 were queried against the Comprehensive Antibiotic Resistance Database v3.0 (downloaded  
101 November 2019) using Blastn 2.10.0(25) with default settings, except for a 97% cut off for query  
102 coverage and 97% percent for percent identity match. Reference genome annotations were  
103 manually reviewed for antibiotic resistance genes and proteins. Drug classes that were not  
104 present in the reference genomes were not included for phenotype testing.

105 Four commercial *Bacillus*-based biopesticide products, Bt subspecies kurstaki strain  
106 SA12, *B. subtilis* strain QST 713 and *B. amyloliquefaciens* strain D747, were purchased and  
107 named: Bt-kurstaki-1, Bt-kurstaki-2, *B. subtilis*, and *B. amyloliquefaciens*. The two Bt products  
108 were the same strain, but from different companies and contained different suspension materials.  
109 Commercial biopesticide products were cultured using standard methods and McFarland  
110 turbidity as specified in the American Society of Microbiology Kirby-Bauer Disk Diffusion  
111 Susceptibility Test Protocol(26) and assayed with Oxoid (Thermo Fisher, USA) antimicrobial  
112 susceptibility disks for clindamycin (2 µg), doxycycline (30 µg), linezolid (30 µg),  
113 sulfamethoxazole/trimethoprim (25 µg), and vancomycin (30 µg). Minimum inhibitory  
114 concentration (MIC) was determined using the standard Clinical and Laboratory Standards  
115 Institute guidelines(27) on replicates using Liofilchem (Liofilchem Inc. MA) antibiotic minimum  
116 inhibitory concentration test strips and aerobe incubation protocols for cephalosporin (0.016 – 256  
117 µg/mL), clindamycin (0.016 – 256 µg/mL), ceftazidime (0.016 – 256 µg/mL),

118 quinupristin/dalfopristin (0.002 – 32 µg/mL), ertapenem (0.002 – 32 µg/mL), imipenem (0.002 –  
119 32 µg/mL), erythromycin (0.016 – 256 µg/mL), and tetracycline (0.016 – 256 µg/mL)  
120 antibiotics. MIC breakpoints were obtained from EUCAST.(28)

121 DNA from biopesticide products was extracted directly and from Luria-Bertani cultures using  
122 Qiagen's DNeasy DNA Extraction kit (Qiagen NV, Germany) with a modified protocol. After  
123 performing the protocol's first step, samples were incubated at 90°C for 10-15 minutes in order to  
124 account for Gram positive cell wall structure. DNA concentration was quantified using a Qubit  
125 fluorometer (Thermo Fisher Scientific, MA) and quality and purity quantified using an Eppendorf  
126 Biospec (Eppendorf, Germany). Libraries were generated using Illumina NextTera Flex kit with IDT set  
127 A Dual Indexes. DNA was sequenced on an Illumina MiSeq platform (Illumina Inc, CA). Sequences  
128 were checked for quality using FastQC v0.11.8(29) and trimmed using Trimmomatic v0.36. (30)  
129 Genomes were assembled using SPAdes v3.11.1.2(31) and assessed for quality using Quast v5.0.0.(32)  
130 Genomes were annotated with RAST v4.0.2(33) and assemblies were queried against CARD and  
131 manually curated for antibiotic resistance annotations and verified against UniProt. (34) Annotated and  
132 CARD-identified antibiotic resistance genes were quantified in R Studio v 1.4.1103.(35)

133

## 134 **Results**

### 135 **Antibiotic Susceptibility**

136 Each biopesticide product demonstrated antibiotic resistance phenotypes to the clinically  
137 relevant antibiotics tested. (**Table 1**) The MIC range for replicates for clindamycin was 0.064  
138 µg/mL to 0.19 µg/mL and erythromycin was 0.125 µg/mL to 0.19 µg/mL. Ertapenem resistance  
139 for all products ranged from 0.125 µg/mL to 0.19 µg/mL. Imipenem resistance was observed in  
140 Bt-kurstaki-1, Bt-kurstaki-2 and *B. amyloliquefaciens* products. Bt-kurstaki-1 was interpreted as

141 resistant with all replicates measuring 1.5 µg/mL. Bt-kurstaki-2 was resistant in 20% of  
142 replicates (sd. 1.6) and 80% were susceptible to imipenem and ranged from 0.094 µg/mL to 4.0  
143 µg/mL. *B. amyloliquefaciens* was susceptible to imipenem in 80% of replicates and ranged from  
144 0.032 µg/mL to 0.75 µg/mL (sd. 0.3). Resistance to quinpristin/dalfopristin was observed in *B.*  
145 *amyloliquefaciens* measuring 3.0 to 4.0 µg/mL (sd. 0.3) and *B. subtilis* measuring 3.0 µg/mL.  
146 Both of these biopesticide products were also resistant to tetracycline. Bt-kurstaki-1 and Bt-  
147 kurstaki-2 had complete resistance to both cephalosporins tested, ceftazidime and cefazolin, with  
148 MICs of 256 µg/mL. Disk diffusion assays showed resistance to two of the five antibiotics  
149 tested. (**Table 2**) Clindamycin resistance was observed in 25% of Bt-kurstaki-1 (n = 12, 0 mm).  
150 Sulfamethoxazole/trimethoprim resistance was observed in 33% of Bt-kurstaki-2 replicates (n =  
151 9, 10 mm). *B. subtilis* and *B. amyloliquefaciens* were susceptible to all five antibiotics. All four  
152 biopesticide products tested were susceptible to doxycycline, linezolid, and vancomycin.  
153 Resistance to five total drug classes, across the four biopesticide products, was observed:  
154 cephalosporins, lincosamides, streptogramins, sulfonamides, and tetracyclines. (**Fig. S1, Fig.S2**)

155

#### 156 Molecular Characterization

157 Genotypes for each biopesticide product contained multiple antibiotic resistance genes  
158 for the five drug classes of the observed resistance phenotypes. Both methods used to identify  
159 antibiotic resistance genes, a curated database of resistance genes and genome annotation,  
160 identified antibiotic resistance genes associated with the nine tested drug classes. For the five  
161 drug classes represented by the resistance phenotypes, CARD identified twelve genes and  
162 genome annotation identified seven. Of the fifty-two total antibiotic resistance genes identified

163 by CARD and the forty-seven identified by genome annotation, less than half resulted in an  
164 expressed resistance phenotype (44% and 47% respectively).

165 CARD identified twenty-two antibiotic resistance genes associated with the antibiotics  
166 tested for susceptibility. (**Fig. 1a**) *Bt-kurstaki-1* had eighteen (82% of the total genes for the nine  
167 tested drug classes) genes for resistance to eight drug classes: carbapenems (*Bla2*, *MexB*,  
168 *MexY*), cephalosporins (*BcI*, *BcII*, *lsaB*, *MexB*, *MexD*, *MexY*), glycopeptides (*vanRM*),  
169 lincosamides (*lsaB*), macrolides (*lsB*, *mdtF*, *MexB*, *MexD*, *MexY*), oxazolidinones (*lsaB*),  
170 sulfonamides (*MexB*, *sul1*), and tetracyclines (*acrA*, *lsaB*, *MexB*, *MexD*, *MexY*, *MuxB*, *MuxC*,  
171 *oqxA*, *oqxB*, *smeE*, *tet(L)*). *Bt-kurstaki-2* had six genes for seven of the drug classes tested:  
172 carbapenems (*Bla2*), cephalosporins (*BcI*, *BcII*, *lsaB*), glycopeptides (*vamRM*), lincosamides  
173 (*lsaB*), macrolides (*lsaB*), oxazolidinones (*lsaB*), and tetracyclines (*acrA*, *lsaB*). *B.*

174 *amyloliquefaciens* and *B. subtilis* products contained the same five genes associated with six of  
175 the tested drug classes: cephalosporins (*hns*), lincosamides (*cfr(B)*, *clbA*, *clcD*), macrolides  
176 (*hns*), oxazolidinones (*cfr(B)*, *clbA*, *clcD*), streptogramins (*cfr(B)*, *clbA*, *clcD*), and tetracyclines  
177 (*hns*, *tet(L)*).

178 Gene annotation of sequenced biopesticide genomes identified twenty-two genes  
179 associated with the antibiotics tested for susceptibility. *Bt-kurstaki-1* and *B. subtilis* contained all  
180 twenty-two genes for eight drug classes. *Bt-kurstaki-2* contained fourteen (67%) genes which  
181 were associated with six drug classes: cephalosporins (*AcrE*, *CmeABC*, *MarA*, *MarB*, *MarR*),  
182 carbapenems (*MarA*, *MarB*, *TolC*), lincosamides (*ErmA*, *ErmB*), macrolides (*CmeABC*, *ErmA*,  
183 *ErmB*), streptogramins (*ErmA*, *ErmB*), and tetracyclines (*AcrA*, *MarA*, *MarB*, *MarR*, *mdfA*,  
184 *tetR*, *TolC*). *B. amyloliquefaciens* had nineteen (86%) genes associated with eight of the tested  
185 drug classes: carbapenems (*MarA*, *MarB*, *TolC*), cephalosporins (*AcrE*, *CmeABC*, *MarA*, *MarB*,



186 MarR), erythromycins (mdlB), glycopeptides (vanW), lincosamides (ErmA, ErmB), macrolides  
187 (CmeABC, ErmA, ErmB, MacA, MacB, TolC), streptogramins (ErmA, ErmB), and tetracyclines  
188 (AcrA, MarA, MarB, MarR, MdfA, tetR, TolC, YkkC, YkkD). The complete list of identified  
189 antibiotic resistance genes are summarized in **Table 3**.

190 The two methods used to determine genotypes provided different results and neither  
191 method accounted for differing genotypes relating to drug class phenotype. Annotation did not  
192 identify genes for oxazolidinone and sulfonamide resistance. Seven resistance genes were  
193 identified by both methods: AcrA, Bla1, CpxA, fosB, MdtB, MdtC, and TolC. Annotation  
194 identified the majority of the genes associated with the antibiotic phenotypes observed. CARD  
195 identified twenty-one drug classes total and genome annotation identified fourteen drug classes.  
196 Comparing the two products with identical strains, eighteen genes were identified by CARD for  
197 Bt-kurstaki-1 and six in Bt-kurstaki-2, whereas annotation identified twenty-two genes in Bt-  
198 kurstaki-1 and fourteen in Bt-kurstaki-2. The quantification of total genes identified by both  
199 methods showed little variation between the two. (**Fig. S3**)

200

## 201 **Discussion**

202 Agricultural practices currently implicated in the antibiotic resistance crisis do not  
203 currently encompass all processes contributing to the spread and maintenance of resistant  
204 bacteria in the environment. Biopesticides are disseminated globally in large quantities but have  
205 yet to be looked into as reservoirs of antibiotic resistance genes resulting in a lack of data  
206 regarding biopesticide-specific strains' resistance phenotypes and accounting of their resistance  
207 genotypes. Assessing antibiotic resistance phenotypes or genotypes has not historically been  
208 included when testing the safety of biopesticide use or included in antibiotic resistance

209 surveillance. Biopesticide products may act as latent carriers and as potential vectors of  
210 resistance to human pathogens which may not be determined by susceptibility testing of  
211 biopesticide products. This study spotlights antibiotic resistance phenotypes and genotypes in  
212 *Bacillus*-based biopesticides and signals the need for investigation of this agricultural practice  
213 acting as reservoirs of antibiotic resistance along the food chain.

214 *Bacillus*-based biopesticide strains harboring a variety of antibiotic resistance genes and  
215 expressing resistance to first-generation antibiotics, such as narrow spectrum beta-lactamases, is  
216 expected. However, resistance phenotypes and genotypes associated with later generation,  
217 clinically important antibiotics is cause for serious concern. The addition of large amounts of live  
218 bacteria for pest control increases the likelihood of horizontal gene exchange between pathogenic  
219 bacteria and biopesticides bearing resistance genotypes. All assayed biopesticide products  
220 demonstrated resistance phenotypes to two clinically important antibiotics. We observed  
221 resistance to five drug classes, all designated critically important by the World Health  
222 Organization: cephalosporins, carbapenems, lincosamides, streptogramins, and tetracyclines.  
223 (36) Genotypes contain genes capable of conferring resistance to additional clinically relevant  
224 antibiotics and biocides. Both *B. thuringiensis* products demonstrated complete resistance to  
225 ceftazidime, a third-generation cephalosporin. Resistance to third-generation broad spectrum  
226 cephalosporins are of special concern, the WHO has categorized this drug class as “highest  
227 priority critically important antimicrobials.”(26) Resistance to imipenem, a broad spectrum beta  
228 lactamase usually reserved for multi-drug resistant infections,(37) was found in one *B.*  
229 *thuringiensis* product, and in some replicates of the other *B. thuringiensis* product, as well as in  
230 *B. amyloliquefaciens* replicates.

231           There are previous examples of studies identifying antibiotic resistance phenotypes and  
232 genotypes in additional biopesticide genera. (38) Patel et al. identified vancomycin resistance  
233 clusters in biopesticide *Paenibacillus popillae*. (39) *Burkholderia ambifaria*, while no longer  
234 approved for biopesticide use in the United States, (40) contains genes required for resistance-  
235 nodulation-cell division (RND) efflux pumps.(40) We identified accessory genes associated with  
236 vancomycin resistance in the assayed biopesticide products, vanRM (CARD) vanW and vanZ  
237 (annotation). While the role of these genes is not currently understood, (39,42) the lack of other  
238 essential components likely explains why vancomycin resistance was not observed in any  
239 product. Luna et. al. tested six *Bacillus* species, both clinical and environmental, for antibiotic  
240 sensitivity and observed susceptibility in 100% of *B. thuringiensis* replicates to erythromycin,  
241 and vancomycin and 95% of replicates were susceptible to clindamycin and  
242 sulfamethoxazole/trimethoprim. (43) These results are similar to our resistance observations for  
243 both antibiotics tested against two *B. thuringiensis* kurstaki products. Turnbull et al. tested  
244 clinical and environmental isolates of *B. thuringiensis* and identified resistance phenotypes with  
245 MICs; 100% of isolates were resistant to cefotaxime, and 80% of isolates were resistant to  
246 tetracycline; with all susceptible to erythromycin and vancomycin. (44) Both *B. thuringiensis*  
247 kurstaki products we tested demonstrated complete resistance to ceftazidime, a third-generation  
248 cephalosporin. Turnbull et. al. isolates were resistant to 3rd generation cephalosporin cefotaxime.  
249 (41) While this study was not testing biopesticide specific strains, this report is also consistent  
250 with our findings.

251           Resistance interpretations were determined by comparing results to EUCAST references.  
252 (28) However, breakpoints for each species of *Bacillus*-based biopesticide are not available for  
253 the majority of clinical antibiotics. When reference values were unavailable interpretations were

254 determined by comparisons to reference values for related pathogenic *Bacillus*-species and  
255 taking into account the strength of the antibiotic dose. Defining resistance phenotypes and  
256 genotypes can readily be expanded to include more biopesticide products and additional  
257 clinically relevant antibiotics. Genes identified by both methods point to multiple drug classes  
258 that require further investigation: *cpxA*, *mtdB*, *mdtC* (aminocourmarins), *Bla1* (penams), *fosB*  
259 (*fosfomycins*), and *arcA*, *TolC* (triclosan). Characterizing the genomes of these products offers  
260 an opportunity to define breakpoints for non-pathogenic species and test for additional antibiotic  
261 resistance.

262         Despite vociferous support for *B. thuringiensis* as the “safest ... microbial insecticide  
263 available to humanity,” (45) antibiotic resistance phenotypes for critically important drug classes  
264 and the potential to share resistance conferring genes via horizontal gene transfer have not been  
265 included in any safety assessment. We observed individual mechanism genes for incomplete  
266 RND efflux pumps, e.g., CARD identified only *smeE*, a member of the complex for a multidrug  
267 RND efflux pump (46) as well as *muxB* and *muxC* which require genes *muxA* and *OpmB* to  
268 function. (47) *TolC* was identified by both methods, in all four biopesticide genomes. This gene  
269 is an essential component of multiple antibiotic resistance gene families: ATP-binding cassette,  
270 major facilitator superfamily, and RND antibiotic efflux pumps. (48) While inactive on their  
271 own, genetic exchange between strains may generate additional phenotypes as individual genes  
272 combine to form functional resistance mechanisms before application. Plasmids have been found  
273 to have very large host ranges and genetically plastic *Bacillus* species are able to host many  
274 plasmids. (49) Multiple genes identified in the biopesticides tested were initially found in mobile  
275 genetic elements: *clbA* is a *cfr* gene found in *B. amyloliquefaciens* subsp. *plantarum* plasmids  
276 (50)and *sul1*, confers sulfonamide resistance, is associated with integrons.(4, 51) It is likely that

277 live bacterial biopesticides come into contact with, and exchange with, other genetically plastic,  
278 agriculture associated, antibiotic resistant pathogens such as *Klebsiella pneumoniae* or  
279 *Escherichia coli*.(4, 52) ToIC has been associated with resistance to fifteen drug classes and has  
280 been identified in resistant *K. pneumoniae* and *E. coli*.(53, 54) Including additional methods for  
281 genotype characterization, such as use of additional curated databases,(55) may assist in  
282 predicting potential vector activity before combining biopesticides. As biopesticides are  
283 commonly used in multi-strain consortia it will be important to experimentally determine the  
284 capability for exchange between the biopesticides themselves and exchange with agriculturally  
285 associated pathogens.

286       Production of *B. thuringiensis* strains for pest control without creating resistance to broad  
287 spectrum antibiotics was proposed as early as 1997, (56) indicating prior concern regarding  
288 application of biopesticides acting as antibiotic resistance gene reservoirs. Despite this initial  
289 concern, the assertions of a large number of studies regarding the safety of live bacterial  
290 pesticides, specifically *B. thuringiensis* strains, mention antibiotic resistance as a factor in their  
291 evaluations.(11-14, 19, 20) Anthropogenic input of resistant bacteria in proximity to the largest  
292 users of antibiotic compounds has the potential to be a major driver in the increased prevalence  
293 of clinically relevant antibiotic resistance genes. To date, this agricultural activity, remains  
294 largely uninvestigated. Globally, live bacterial biopesticide products play an essential role in  
295 replacing toxic, chemically synthesized pesticides and offer an inexpensive and effective method  
296 of pest control. However, our results show the potential of biopesticides as a large reservoir for  
297 the generation and dissemination of antibiotic resistance genes on a global scale. While  
298 biopesticides have a role in providing safe food production, we have demonstrated that they also  
299 may play a role in the antibiotic resistance crisis. We anticipate the role of biopesticides acting

300 reservoirs and vectors of clinically relevant antibiotic resistance genes to become part of the  
301 continued research regarding agricultural practices and the generation and spread of antibiotic  
302 resistance in the environment. Globally, live bacterial biopesticide products play an important  
303 role in replacing toxic, chemically synthesized pesticides and offer an inexpensive and effective  
304 method of pest control. However, our results show the potential of biopesticides as a large  
305 reservoir for the generation and dissemination of antibiotic resistance genes on a global scale.  
306 While biopesticides play an important role in providing safe food production, we have  
307 demonstrated that they also maybe play an important role in the antibiotic resistance crisis.

308 References

- 309 1. Center for Disease Control, 2019. Antibiotic Resistance Threats in the United States 2019. US Health  
310 and Human Services, Atlanta, GA, USA.
- 311 2. Aslam, B., Wang, W., Arshad, M.I., Khurshid, M., Muzammil, S., Rasool, M.H., Nisar, M.A., Alvi,  
312 R.F., Aslam, M.A., Qamar, M.U. and Salamat, M.K.F., 2018. Antibiotic resistance: a rundown of a  
313 global crisis. *Infection and drug resistance*, 11, p.1645.
- 314 3. Schwarz, S., Fessler, A.T., Loncaric, I., Wu, C., Kadlec, K., Wang, Y. and Shen, J., 2018.  
315 Antimicrobial resistance among staphylococci of animal origin. *Antimicrobial Resistance in Bacteria  
316 from Livestock and Companion Animals*, pp.127-157.
- 317 4. Jechalke, S., Heuer, H., Siemens, J., Amelung, W. and Smalla, K., 2014. Fate and effects of  
318 veterinary antibiotics in soil. *Trends in microbiology*, 22(9), pp.536-545.
- 319 5. Munk, P., Knudsen, B.E., Lukjancenko, O., Duarte, A.S.R., Van Gompel, L., Luiken, R.E., Smit,  
320 L.A., Schmitt, H., Garcia, A.D., Hansen, R.B. and Petersen, T.N., 2018. Abundance and diversity of  
321 the faecal resistome in slaughter pigs and broilers in nine European countries. *Nature  
322 microbiology*, 3(8), pp.898-908.
- 323 6. Khachatourians, G.G., 1998. Agricultural use of antibiotics and the evolution and transfer of  
324 antibiotic-resistant bacteria. *Cmaj*, 159(9), pp.1129-1136.
- 325 7. Hernando-Amado, S., Coque, T.M., Baquero, F. and Martínez, J.L., 2019. Defining and combating  
326 antibiotic resistance from One Health and Global Health perspectives. *Nature Microbiology*, 4(9),  
327 pp.1432-1442.
- 328 8. Food and Drug Administration, 2015. Antimicrobials sold or distributed for use in food-producing  
329 animals. *US Food and Drug Administration: Silver Spring, MD, USA*.
- 330 9. Anderson, J.A., Staley, J., Challender, M. and Heuton, J., 2018. Safety of *Pseudomonas chlororaphis*  
331 as a gene source for genetically modified crops. *Transgenic research*, 27(1), pp.103-113.
- 332 10. Parnell, J.J., Berka, R., Young, H.A., Sturino, J.M., Kang, Y., Barnhart, D.M. and DiLeo, M.V.,  
333 2016. From the lab to the farm: an industrial perspective of plant beneficial  
334 microorganisms. *Frontiers in plant science*, 7, p.1110.
- 335 11. EFSA Panel on Biological Hazards (BIOHAZ), 2016. Risks for public health related to the presence  
336 of *Bacillus cereus* and other *Bacillus* spp. including *Bacillus thuringiensis* in foodstuffs. *EFSA  
337 Journal*, 14(7), p.e04524.
- 338 12. Roh, J.Y., Choi, J.Y., Li, M.S., Jin, B.R. and Je, Y.H., 2007. *Bacillus thuringiensis* as a specific, safe,  
339 and effective tool for insect pest control. *Journal of microbiology and biotechnology*, 17(4), pp.547-  
340 559.

- 341 13. Federici, B.A. and Siegel, J.P., 2008. Safety assessment of *Bacillus thuringiensis* and Bt crops used in  
342 insect control. *Food Science and Technology-New York-Marcel Dekker-*, 172, p.45.
- 343 14. Siegel, J.P., 2001. The mammalian safety of *Bacillus thuringiensis*-based insecticides. *Journal of*  
344 *invertebrate pathology*, 77(1), pp.13-21.
- 345 15. Nicolopoulou-Stamati, P., Maipas, S., Kotampasi, C., Stamatis, P. and Hens, L., 2016. Chemical  
346 pesticides and human health: the urgent need for a new concept in agriculture. *Frontiers in public*  
347 *health*, 4, p.148.
- 348 16. Hernández, A.F., Parrón, T., Tsatsakis, A.M., Requena, M., Alarcón, R. and López-Guarnido, O.,  
349 2013. Toxic effects of pesticide mixtures at a molecular level: their relevance to human  
350 health. *Toxicology*, 307, pp.136-145.
- 351 17. Food and Drug Administration, 2016. *Substances Generally Recognized as Safe*. vol. 81 .*US Food*  
352 *and Drug Administration: Silver Spring, MD, USA*.
- 353 18. Van den Berg, H., 2009. Global status of DDT and its alternatives for use in vector control to prevent  
354 disease. *Environmental health perspectives*, 117(11), pp.1656-1663.
- 355 19. Smitley, D.R. and Davis, T.W., 1993. Aerial application of *Bacillus thuringiensis* for suppression of  
356 gypsy moth (Lepidoptera: Lymantriidae) in *Populus-Quercus* forests. *Journal of economic*  
357 *entomology*, 86(4), pp.1178-1184.
- 358 20. Bravo, A., Likitvivanavong, S., Gill, S.S. and Soberón, M., 2011. *Bacillus thuringiensis*: a story of a  
359 successful bioinsecticide. *Insect biochemistry and molecular biology*, 41(7), pp.423-431.
- 360 21. Höfte, H. and Whiteley, H.R., 1989. Insecticidal crystal proteins of *Bacillus*  
361 *thuringiensis*. *Microbiology and Molecular Biology Reviews*, 53(2), pp.242-255.
- 362 22. Reyes-Ramírez, A. and Ibarra, J.E., 2008. Plasmid patterns of *Bacillus thuringiensis* type  
363 strains. *Applied and Environmental Microbiology*, 74(1), pp.125-129.
- 364 23. Jia, B., Raphenya, A.R., Alcock, B., Waglechner, N., Guo, P., Tsang, K.K., Lago, B.A., Dave, B.M.,  
365 Pereira, S., Sharma, A.N. and Doshi, S., 2016. CARD 2017: expansion and model-centric curation of  
366 the comprehensive antibiotic resistance database. *Nucleic acids research*, p.gkw1004.
- 367 24. California Department of Pesticide Regulation, 2018. Summary of Pesticide Use Report Data-2019.
- 368 25. NCBI. National Center for Biotechnology Information (NCBI)[Internet]. Bethesda (MD): National  
369 Library of Medicine (US), National Center for Biotechnology Information; [2019] – [cited 2019 Jan  
370 20]. Available from: <https://www.ncbi.nlm.nih.gov/>. (2019).
- 371 26. Hudzicki, J., 2009. Kirby-Bauer disk diffusion susceptibility test protocol.



- 372 27. Humphries, R.M., Ambler, J., Mitchell, S.L., Castanheira, M., Dingle, T., Hindler, J.A., Koeth, L. and  
373 Sei, K., 2018. CLSI methods development and standardization working group best practices for  
374 evaluation of antimicrobial susceptibility tests. *Journal of clinical microbiology*, 56(4).
- 375 28. EUCAST: "The European Committee on Antimicrobial Susceptibility Testing. Breakpoint tables for  
376 interpretation of MICs and zone diameters, version 10.0, 2020"
- 377 29. Andrews, S., 2010. FastQC: a quality control tool for high throughput sequence data.
- 378 30. Bolger, A.M., Lohse, M. and Usadel, B., 2014. Trimmomatic: a flexible trimmer for Illumina  
379 sequence data. *Bioinformatics*, 30(15), pp.2114-2120.
- 380 31. Bankevich, A., Nurk, S., Antipov, D., Gurevich, A.A., Dvorkin, M., Kulikov, A.S., Lesin, V.M.,  
381 Nikolenko, S.I., Pham, S., Prjibelski, A.D. and Pyshkin, A.V., 2012. SPAdes: a new genome  
382 assembly algorithm and its applications to single-cell sequencing. *Journal of computational  
383 biology*, 19(5), pp.455-477.
- 384 32. Gurevich, A., Saveliev, V., Vyahhi, N. and Tesler, G., 2013. QUAST: quality assessment tool for  
385 genome assemblies. *Bioinformatics*, 29(8), pp.1072-1075.
- 386 33. Aziz, R.K., Bartels, D., Best, A.A., DeJongh, M., Disz, T., Edwards, R.A., Formsma, K., Gerdes, S.,  
387 Glass, E.M., Kubal, M. and Meyer, F., 2008. The RAST Server: rapid annotations using subsystems  
388 technology. *BMC genomics*, 9(1), pp.1-15.
- 389 34. Apweiler, R., Bairoch, A., Wu, C.H., Barker, W.C., Boeckmann, B., Ferro, S., Gasteiger, E., Huang,  
390 H., Lopez, R., Magrane, M. and Martin, M.J., 2004. UniProt: the universal protein  
391 knowledgebase. *Nucleic acids research*, 32(suppl\_1), pp.D115-D119.
- 392 35. Allaire, J., 2012. RStudio: integrated development environment for R. *Boston, MA*, 770, p.394.
- 393 36. World Health Organization, 2017. Critically important antimicrobials for human medicine: ranking of  
394 antimicrobial agents for risk management of antimicrobial resistance due to non-human use.
- 395 37. Smith, J.R., Rybak, J.M. and Claeys, K.C., 2020. Imipenem-Cilastatin-Relebactam: A Novel  $\beta$ -  
396 Lactam- $\beta$ -Lactamase Inhibitor Combination for the Treatment of Multidrug-Resistant Gram-  
397 Negative Infections. *Pharmacotherapy: The Journal of Human Pharmacology and Drug  
398 Therapy*, 40(4), pp.343-356.
- 399 38. Belbahri, L., Chenari Bouket, A., Rekik, I., Alenezi, F.N., Vallat, A., Luptakova, L., Petrovova, E.,  
400 Oszako, T., Cherrad, S., Vacher, S. and Rateb, M.E., 2017. Comparative genomics of *Bacillus*  
401 *amyloliquefaciens* strains reveals a core genome with traits for habitat adaptation and a secondary  
402 metabolites rich accessory genome. *Frontiers in microbiology*, 8, p.1438.
- 403 39. Patel, R., Piper, K., Cockerill, F.R., Steckelberg, J.M. and Yousten, A.A., 2000. The biopesticide  
404 *Paenibacillus popilliae* has a vancomycin resistance gene cluster homologous to the enterococcal

- 405 VanA vancomycin resistance gene cluster. *Antimicrobial agents and chemotherapy*, 44(3), pp.705-  
406 709.
- 407 40. Coenye, T., Mahenthalingam, E., Henry, D., LiPuma, J.J., Laevens, S., Gillis, M., Speert, D.P. and  
408 Vandamme, P., 2001. *Burkholderia ambifaria* sp. nov., a novel member of the *Burkholderia cepacia*  
409 complex including biocontrol and cystic fibrosis-related isolates. *International Journal of Systematic*  
410 *and Evolutionary Microbiology*, 51(4), pp.1481-1490.
- 411 41. Gugliera, P., Pasca, M.R., De Rossi, E., Buroni, S., Arrigo, P., Manina, G. and Riccardi, G., 2006.  
412 Efflux pump genes of the resistance-nodulation-division family in *Burkholderia cenocepacia*  
413 genome. *BMC microbiology*, 6(1), pp.1-14.
- 414 42. Mühlberg, E., Umstätter, F., Kleist, C., Domhan, C., Mier, W. and Uhl, P., 2020. Renaissance of  
415 vancomycin: Approaches for breaking antibiotic resistance in multidrug-resistant bacteria. *Canadian*  
416 *journal of microbiology*, 66(1), pp.11-16.
- 417 43. Luna, V.A., King, D.S., Gullledge, J., Cannons, A.C., Amuso, P.T. and Cattani, J., 2007.  
418 Susceptibility of *Bacillus anthracis*, *Bacillus cereus*, *Bacillus mycoides*, *Bacillus pseudomycooides* and  
419 *Bacillus thuringiensis* to 24 antimicrobials using Sensititre® automated microbroth dilution and  
420 Etest® agar gradient diffusion methods. *Journal of antimicrobial chemotherapy*, 60(3), pp.555-567.
- 421 44. Turnbull, P.C., Sirianni, N.M., LeBron, C.I., Samaan, M.N., Sutton, F.N., Reyes, A.E. and Peruski,  
422 L.F., 2004. MICs of selected antibiotics for *Bacillus anthracis*, *Bacillus cereus*, *Bacillus thuringiensis*,  
423 and *Bacillus mycoides* from a range of clinical and environmental sources as determined by the  
424 Etest. *Journal of clinical microbiology*, 42(8), pp.3626-3634.
- 425 45. Raymond, B. and Federici, B.A., 2017. In defence of *Bacillus thuringiensis*, the safest and most  
426 successful microbial insecticide available to humanity—a response to EFSA. *FEMS microbiology*  
427 *ecology*, 93(7), p.fix084.
- 428 46. Zhang, L., Li, X.Z. and Poole, K., 2001. SmeDEF multidrug efflux pump contributes to intrinsic  
429 multidrug resistance in *Stenotrophomonas maltophilia*. *Antimicrobial agents and*  
430 *chemotherapy*, 45(12), pp.3497-3503.
- 431 47. Mima, T., Kohira, N., Li, Y., Sekiya, H., Ogawa, W., Kuroda, T. and Tsuchiya, T., 2009. Gene  
432 cloning and characteristics of the RND-type multidrug efflux pump MuxABC-OpmB possessing two  
433 RND components in *Pseudomonas aeruginosa*. *Microbiology*, 155(11), pp.3509-3517.
- 434 48. Sharff, A., Fanutti, C., Shi, J., Calladine, C. and Luisi, B., 2001. The role of the TolC family in  
435 protein transport and multidrug efflux. From stereochemical certainty to mechanistic  
436 hypothesis. *European Journal of Biochemistry*, 268(19), pp.5011-5026.

- 437 49. Brooks, L.E., Kaze, M. and Sistro, M., 2019. Where the plasmids roam: large-scale sequence  
438 analysis reveals plasmids with large host ranges. *Microbial genomics*, 5(1).
- 439 50. Vester, B., 2018. The cfr and cfr-like multiple resistance genes. *Research in microbiology*, 169(2),  
440 pp.61-66.
- 441 51. Chen, Y.T., Liao, T.L., Liu, Y.M., Lauderdale, T.L., Yan, J.J. and Tsai, S.F., 2009. Mobilization of  
442 qnrB2 and ISCR1 in plasmids. *Antimicrobial agents and chemotherapy*, 53(3), pp.1235-1237.
- 443 52. Boehme, S., Werner, G., Klare, I., Reissbrodt, R. and Witte, W., 2004. Occurrence of antibiotic-  
444 resistant enterobacteria in agricultural foodstuffs. *Molecular nutrition & food research*, 48(7), pp.522-  
445 531.
- 446 53. Iyer, R., Moussa, S.H., Tommasi, R. and Miller, A.A., 2019. Role of the Klebsiella pneumoniae TolC  
447 porin in antibiotic efflux. *Research in microbiology*, 170(2), pp.112-116.
- 448 54. Nishino, K., Yamada, J., Hirakawa, H., Hirata, T. and Yamaguchi, A., 2003. Roles of TolC-  
449 dependent multidrug transporters of Escherichia coli in resistance to  $\beta$ -lactams. *Antimicrobial Agents  
450 and Chemotherapy*, 47(9), pp.3030-3033.
- 451 55. Brooks, L., Kaze, M. and Sistro, M., 2019. A curated, comprehensive database of plasmid  
452 sequences. *Microbiology resource announcements*, 8(1).
- 453 56. Sanchis, V., Agaisse, H., Chaufaux, J. and Lereclus, D., 1997. A recombinase-mediated system for  
454 elimination of antibiotic resistance gene markers from genetically engineered Bacillus thuringiensis  
455 strains. *Applied and environmental microbiology*, 63(2), pp.779-784.

| Antibiotic                           | Biopesticide                | Number replicates | MIC ( $\mu\text{g/mL}$ ) |       |       | MIC Interpretation |    |     | Breakpoint ( $\mu\text{g/mL}$ ) |              |
|--------------------------------------|-----------------------------|-------------------|--------------------------|-------|-------|--------------------|----|-----|---------------------------------|--------------|
|                                      |                             |                   | Min.                     | Max.  | Range | S%                 | I% | R%  | S ( $\leq$ )                    | R ( $\geq$ ) |
| Cefazolin                            | Bt-kurstaki-1               | 5                 | 256                      | >256  | 0     |                    |    | 100 | -                               | -            |
| KZ                                   | Bt-kurstaki-2               | 5                 | 256                      | >256  | 0     |                    |    | 100 | -                               | -            |
|                                      | <i>B. amyloliquefaciens</i> | 5                 | 0.125                    | 0.125 | 0     | 100                |    |     | -                               | -            |
|                                      | <i>B. subtilis</i>          | 5                 | 0.064                    | 0.094 | 0.03  | 100                |    |     | -                               | -            |
| Ceftazidime<br>CAZ                   | Bt-kurstaki-1               | 5                 | 265                      | >256  | 0     |                    |    | 100 | -                               | -            |
|                                      | Bt-kurstaki-2               | 5                 | 265                      | >256  | 0     |                    |    | 100 | -                               | -            |
|                                      | <i>B. amyloliquefaciens</i> | NA                |                          |       |       |                    |    |     | -                               | -            |
|                                      | <i>B. subtilis</i>          | NA                |                          |       |       |                    |    |     | -                               | -            |
| Clindamycin<br>CD                    | Bt-kurstaki-1               | 5                 | 0.125                    | 0.19  | 0.065 | 100                |    |     | 1.0                             | 1.0          |
|                                      | Bt-kurstaki-2               | 5                 | 0.19                     | 0.19  | 0     | 100                |    |     | 1.0                             | 1.0          |
|                                      | <i>B. amyloliquefaciens</i> | NA                |                          |       |       |                    |    |     | -                               | -            |
|                                      | <i>B. subtilis</i>          | 5                 | 0.064                    | 0.064 | 0     | 100                |    |     | 1.0                             | 1.0          |
| Ertapenem<br>ETP                     | Bt-kurstaki-1               | 10                | 0.125                    | 0.125 | 0     | 100                |    |     | -                               | -            |
|                                      | Bt-kurstaki-2               | 10                | 0.19                     | 0.19  | 0     | 100                |    |     | -                               | -            |
|                                      | <i>B. amyloliquefaciens</i> | 10                | 0.125                    | 0.125 | 0     | 100                |    |     | -                               | -            |
|                                      | <i>B. subtilis</i>          | 10                | 0.125                    | 0.19  | 0.065 | 100                |    |     | -                               | -            |
| Erythromycin<br>E                    | Bt-kurstaki-1               | 5                 | 0.064                    | 0.19  | 0.126 | 100                |    |     | 0.5                             | 0.5          |
|                                      | Bt-kurstaki-2               | 5                 | 0.19                     | 0.19  | 0     | 100                |    |     | 0.5                             | 0.5          |
|                                      | <i>B. amyloliquefaciens</i> | 5                 | 0.125                    | 0.125 | 0     | 100                |    |     | 0.5                             | 0.5          |
|                                      | <i>B. subtilis</i>          | 5                 | 0.002                    | 0.25  | 0.248 | 100                |    |     | 0.5                             | 0.5          |
| Imipenem<br>IMI                      | Bt-kurstaki-1               | 10                | 1.5                      | 1.5   | 0     |                    |    | 100 | 0.5                             | 0.5          |
|                                      | Bt-kurstaki-2               | 10                | 0.094                    | 4     | 3.906 | 80                 |    | 20  | 0.5                             | 0.5          |
|                                      | <i>B. amyloliquefaciens</i> | 10                | 0.032                    | 0.75  | 0.718 | 80                 |    | 20  | 0.5                             | 0.5          |
|                                      | <i>B. subtilis</i>          | 8                 | 0.125                    | 0.125 | 0     | 100                |    |     | 0.5                             | 0.5          |
| Quinupristin/<br>Dalfopristin<br>QDA | Bt-kurstaki-1               | NA                |                          |       |       |                    |    |     | -                               | -            |
|                                      | Bt-kurstaki-2               | NA                |                          |       |       |                    |    |     | -                               | -            |
|                                      | <i>B. amyloliquefaciens</i> | 3                 | 3                        | 4     | 1     |                    |    | 100 | -                               | -            |
|                                      | <i>B. subtilis</i>          | 3                 | 3                        | 3     | 0     |                    |    | 100 | -                               | -            |
| Tetracycline<br>T                    | Bt-kurstaki-1               | NA                |                          |       |       |                    |    |     | -                               | -            |
|                                      | Bt-kurstaki-2               | NA                |                          |       |       |                    |    |     | -                               | -            |
|                                      | <i>B. amyloliquefaciens</i> | 3                 | 4                        | 4     | 0     |                    |    | 100 | -                               | -            |
|                                      | <i>B. subtilis</i>          | 3                 | 3                        | 3     | 0     |                    |    | 100 | -                               | -            |

% S, % susceptible; %I, % intermediate; %R, resistant; -, indicates EUCAST breakpoint references unavailable; NA, antibiotic not tested.

| Antibiotic                                 | Biopesticide                | Number replicates | Zone Diameter (mm) |      |       | Interpretation |    |    | Breakpoint (mm) |              |
|--------------------------------------------|-----------------------------|-------------------|--------------------|------|-------|----------------|----|----|-----------------|--------------|
|                                            |                             |                   | Min.               | Max. | Range | S%             | I% | R% | S ( $\leq$ )    | R ( $\geq$ ) |
| Clindamycin                                | Bt-kurstaki-1               | 12                | 0                  | 20   | 20    | 75             |    | 25 | 17              | 17           |
| DA2                                        | Bt-kurstaki-2               | 12                | 22                 | 24   | 2     | 100            |    |    | 17              | 17           |
|                                            | <i>B. amyloliquefaciens</i> | 12                | 30                 | 31   | 1     | 100            |    |    | 17              | 17           |
|                                            | <i>B. subtilis</i>          | 12                | 30                 | 30   | 1     | 100            |    |    | 17              | 17           |
|                                            |                             |                   |                    |      |       |                |    |    |                 |              |
| Doxycycline<br>DO30                        | Bt-kurstaki-1               | 9                 | 20                 | 20   | 0     | 100            |    |    | -               | -            |
|                                            | Bt-kurstaki-2               | 9                 | 18                 | 19   | 1     | 100            |    |    | -               | -            |
|                                            | <i>B. amyloliquefaciens</i> | 9                 | 19                 | 21   | 2     | 100            |    |    | -               | -            |
|                                            | <i>B. subtilis</i>          | 9                 | 19                 | 20   | 1     | 100            |    |    | -               | -            |
| Linezolid<br>LZD30                         | Bt-kurstaki-1               | 12                | 35                 | 36   | 1     | 100            |    |    | 22              | 22           |
|                                            | Bt-kurstaki-2               | 12                | 28                 | 29   | 1     | 100            |    |    | 22              | 22           |
|                                            | <i>B. amyloliquefaciens</i> | 12                | 29                 | 30   | 1     | 100            |    |    | 22              | 22           |
|                                            | <i>B. subtilis</i>          | 12                | 28                 | 31   | 3     | 100            |    |    | 22              | 22           |
| Sulfamethoxazole/<br>Trimethoprim<br>SXT25 | Bt-kurstaki-1               | 9                 | 20                 | 20   | 0     | 100            |    |    | -               | -            |
|                                            | Bt-kurstaki-2               | 9                 | 10                 | 22   | 12    | 67             |    | 33 | -               | -            |
|                                            | <i>B. amyloliquefaciens</i> | 9                 | 31                 | 31   | 0     | 100            |    |    | -               | -            |
|                                            | <i>B. subtilis</i>          | 9                 | 27                 | 28   | 0     | 100            |    |    | -               | -            |
| Vancomycin<br>VA30                         | Bt-kurstaki-1               | 12                | 22                 | 22   | 0     | 100            |    |    | 10              | 10           |
|                                            | Bt-kurstaki-2               | 12                | 19                 | 20   | 0     | 100            |    |    | 10              | 10           |
|                                            | <i>B. amyloliquefaciens</i> | 12                | 21                 | 21   | 0     | 100            |    |    | 10              | 10           |
|                                            | <i>B. subtilis</i>          | 12                | 21                 | 21   | 0     | 100            |    |    | 10              | 10           |

% S, % susceptible; %I, % intermediate; %R, resistant; -, indicate EUCAST breakpoint references unavailable.

## Molecular Characterization of Bacillus-based Biopesticides

2a

| Biopesticide                | Antibiotic Resistance Gene (CARD) |             |              |             |               |             |             |            |             |             |             |             |             |             |             |             |             |             |             |             |               |              |  |
|-----------------------------|-----------------------------------|-------------|--------------|-------------|---------------|-------------|-------------|------------|-------------|-------------|-------------|-------------|-------------|-------------|-------------|-------------|-------------|-------------|-------------|-------------|---------------|--------------|--|
|                             | <i>acrA</i>                       | <i>BclI</i> | <i>BclII</i> | <i>Bla2</i> | <i>cfr(B)</i> | <i>clbA</i> | <i>cleD</i> | <i>hns</i> | <i>IsaB</i> | <i>mdtF</i> | <i>mexB</i> | <i>mexD</i> | <i>mexY</i> | <i>nphA</i> | <i>muxB</i> | <i>muxC</i> | <i>oqxA</i> | <i>oqxB</i> | <i>smeE</i> | <i>sulI</i> | <i>tet(L)</i> | <i>vanRM</i> |  |
| <i>Bt-kurstaki1</i>         |                                   |             |              |             |               |             |             |            |             |             |             |             |             |             |             |             |             |             |             |             |               |              |  |
| <i>Bt-kurstaki2</i>         |                                   |             |              |             |               |             |             |            |             |             |             |             |             |             |             |             |             |             |             |             |               |              |  |
| <i>B. amyloliquefaciens</i> |                                   |             |              |             |               |             |             |            |             |             |             |             |             |             |             |             |             |             |             |             |               |              |  |
| <i>B. subtilis</i>          |                                   |             |              |             |               |             |             |            |             |             |             |             |             |             |             |             |             |             |             |             |               |              |  |

2b

| Biopesticide                | Antibiotic Resistance Gene (Annotation) |             |                 |              |             |             |             |             |             |             |             |             |             |             |             |             |             |             |             |             |             |             |  |
|-----------------------------|-----------------------------------------|-------------|-----------------|--------------|-------------|-------------|-------------|-------------|-------------|-------------|-------------|-------------|-------------|-------------|-------------|-------------|-------------|-------------|-------------|-------------|-------------|-------------|--|
|                             | <i>AcrA</i>                             | <i>AcrE</i> | <i>Ber/CfIA</i> | <i>AmpHI</i> | <i>CmeA</i> | <i>CmeB</i> | <i>CmeC</i> | <i>ErmA</i> | <i>ErmB</i> | <i>MacA</i> | <i>MacB</i> | <i>MarA</i> | <i>MarB</i> | <i>MarR</i> | <i>MdfA</i> | <i>mdIB</i> | <i>tetR</i> | <i>TolC</i> | <i>vanW</i> | <i>vanZ</i> | <i>YkkC</i> | <i>YkkD</i> |  |
| <i>Bt-kurstaki1</i>         |                                         |             |                 |              |             |             |             |             |             |             |             |             |             |             |             |             |             |             |             |             |             |             |  |
| <i>Bt-kurstaki2</i>         |                                         |             |                 |              |             |             |             |             |             |             |             |             |             |             |             |             |             |             |             |             |             |             |  |
| <i>B. amyloliquefaciens</i> |                                         |             |                 |              |             |             |             |             |             |             |             |             |             |             |             |             |             |             |             |             |             |             |  |
| <i>B. subtilis</i>          |                                         |             |                 |              |             |             |             |             |             |             |             |             |             |             |             |             |             |             |             |             |             |             |  |

**Figure 2.** Molecular characterization of commercial biopesticides showing the presence of antibiotic resistance genes associated with each drug class resistance phenotypes. **a.** CARD-identified ARG for each commercial biopesticide product. **b.** Annotation-identified ARG for each commercial biopesticide. Dark squares indicate gene presence.

**Table 3. Antibiotic Resistance Genes Summary**

| Resistance Gene    | Identified by    | Gene Family                               | Resistance Mechanism | Drug Class                                                                                                                                                                         | Reference                                          |
|--------------------|------------------|-------------------------------------------|----------------------|------------------------------------------------------------------------------------------------------------------------------------------------------------------------------------|----------------------------------------------------|
| <i>AAC(3)-VIIa</i> | CARD             | AAC(3)                                    | Inactivation         | Aminoglycosides                                                                                                                                                                    | Lopez-Cabrera M, et al. 1989                       |
| <i>AAC(3)-Xa</i>   | CARD             | AAC(3)                                    | Inactivation         | Aminoglycosides                                                                                                                                                                    | Ishikawa J, et al. 2000                            |
| <i>acrA</i>        | CARD, Annotation | RND Efflux pump                           | Efflux               | Fluoroquinolones, Glycylcyclines, Penams, Rifamycins, Cephalosporins, Tetracyclines, Triclosan                                                                                     | Mikoloko J, et al. 2006, Poole K. 2004             |
| <i>AcrD</i>        | CARD             | RND Efflux pump                           | Efflux               | Aminoglycosides                                                                                                                                                                    | Rosenberg EY, et al. 2000                          |
| <i>AcrE</i>        | Annotation       | RND Efflux pump                           | Efflux               | Cephalosporins, Cephamycins, Fluoroquinolones, Penams                                                                                                                              | Lau SY, et al., 2005                               |
| <i>AmpC</i>        | Annotation       | ACC beta-lactamase                        | Inactivation         | Cephalosporins, Monobactams, Penams                                                                                                                                                | Lister PD, et al. 2009                             |
| <i>amrA</i>        | CARD             | RND Efflux pump                           | Efflux               | Aminoglycosides                                                                                                                                                                    | Jassem AN, et al. 2014                             |
| <i>ArnC</i>        | Annotation       | PMR phosphoethanolamine transferase       | Target alteration    | Peptides                                                                                                                                                                           | Gunn JS, et al. 1998                               |
| <i>BeeAB</i>       | Annotation       | ABC transporters                          | Target alteration    | Peptides                                                                                                                                                                           | Bernard, Remi, et al. 2007                         |
| <i>Bcl</i>         | CARD             | Be beta-lactamase                         | Inactivation         | Cephalosporins, Penams                                                                                                                                                             | Carfi A, et al. 1995                               |
| <i>BclI</i>        | CARD             | Be beta-lactamase                         | Inactivation         | Cephalosporins, Penams                                                                                                                                                             | Carfi A, et al. 1995                               |
| <i>BerC/IIA</i>    | Annotation       | MFS Efflux pump                           | Efflux               | Tetracyclines                                                                                                                                                                      | Kumar, S, et al., 2012                             |
| <i>Bla/Mec</i>     | Annotation       | Methicillin resistant PBP2                | Target replacement   | Penam                                                                                                                                                                              | Joon, S., et al., 2000                             |
| <i>Bla1</i>        | CARD, Annotation | Class A Bacillus anthracis beta-lactamase | Inactivation         | Penam                                                                                                                                                                              | Kim SK, et al. 2016                                |
| <i>Bla2</i>        | CARD             | Class A Bacillus anthracis beta-lactamase | Inactivation         | Penam                                                                                                                                                                              | Kim SK, et al. 2016                                |
| <i>bmr</i>         | CARD             | MFS Efflux pump                           | Efflux               | Fluoroquinolones, Nucleosides                                                                                                                                                      | Klyachko KA, et al. 1997                           |
| <i>catI</i>        | CARD             | Chloramphenicol acetyltransferase         | Inactivation         | Phenicol                                                                                                                                                                           | Elisha BG, et al. 199                              |
| <i>cfr(B)</i>      | CARD             | Cfr 23S ribosomal RNA methyltransferase   | Target alteration    | Lincosamides, Oxazolidinones, Streptogramins                                                                                                                                       | Deshpande LM, et al. 2015                          |
| <i>clbA</i>        | CARD             | Cfr 23S ribosomal RNA methyltransferase   | Target alteration    | Lincosamides, Oxazolidinones, Streptogramins                                                                                                                                       | Hansen LH, et al. 2012                             |
| <i>clcD</i>        | CARD             | Cfr 23S ribosomal RNA methyltransferase   | Target alteration    | Lincosamides, Oxazolidinones, Streptogramins                                                                                                                                       | Hansen LH, et al. 2015                             |
| <i>CmeABC</i>      | Annotation       | RND Efflux pump                           | Efflux               | Cephalosporins, Fluoroquinolones, Macrolides                                                                                                                                       | Yao H, et al. 2016                                 |
| <i>cmIR</i>        | CARD             | MFS Efflux pump                           | Efflux               | Phenicol                                                                                                                                                                           | Dittrich W, et al. 1991                            |
| <i>CpxA</i>        | CARD, Annotation | RND Efflux pump                           | Efflux               | Aminocoumarins, Aminoglycosides                                                                                                                                                    | Srinivasan VB, et al. 201                          |
| <i>CRP</i>         | CARD             | RND Efflux pump                           | Efflux               | Cephalosporins, Fluoroquinolones, Macrolides                                                                                                                                       | Nishino K, et al. 2008                             |
| <i>emrB</i>        | CARD             | MFS Efflux pump                           | Efflux               | Fluoroquinolones                                                                                                                                                                   | Lomovskaya O, et al. 1992                          |
| <i>ErmAB</i>       | Annotation       | Erm 23S ribosomal RNA methyltransferase   | Target alteration    | Lincosamides, Macrolides, Streptogramins                                                                                                                                           | Malhotra-Kumar S, et al. 2008, Min YH, et al. 2008 |
| <i>FoxA</i>        | Annotation       | Fosfomycin thiol transferase              | Inactivation         | Fosfomycins                                                                                                                                                                        | Beharry Z, et al. 2005                             |
| <i>fosA5</i>       | CARD             | Fosfomycin thiol transferase              | Inactivation         | Fosfomycins                                                                                                                                                                        | Ma Y, et al. 2015                                  |
| <i>fosA6</i>       | CARD             | Fosfomycin thiol transferase              | Inactivation         | Fosfomycins                                                                                                                                                                        | Guo Q, et al. 2016                                 |
| <i>FosB</i>        | CARD, Annotation | Fosfomycin thiol transferase              | Inactivation         | Fosfomycins                                                                                                                                                                        | Thompson MK, et al. 2014                           |
| <i>hns</i>         | CARD             | RND Efflux pump                           | Efflux               | Cephalosporins, Cephamycins, Fluoroquinolones, Macrolides, Penams, Tetracyclines                                                                                                   | Nishino K., et al., 2004                           |
| <i>Lde</i>         | Annotation       | MFS Efflux pump                           | Efflux               | Fluoroquinolones                                                                                                                                                                   | Godreuil, et al. 2003                              |
| <i>IsaB</i>        | CARD             | ABC-F ATP-binding cassette protection     | Target protection    | Lincosamides, Macrolides, Oxazolidinones, Phenicol, Streptogramins, Tetracyclines                                                                                                  | Malbrunby B, et al. 2011                           |
| <i>MacAB-ToIC</i>  | Annotation       | ABC efflux pump                           | Efflux               | Macrolides                                                                                                                                                                         | Nishino K, et al. 2005                             |
| <i>MarRAB</i>      | Annotation       | RND Efflux pump                           | Efflux               | Fluoroquinolones, Glycylcyclines, Penams, Rifamycins, Cephalosporins, Tetracyclines, Triclosan                                                                                     | Seoane, A., et al., 1995                           |
| <i>MdfA</i>        | Annotation       | MFS Efflux pump                           | Efflux               | Tetracyclines                                                                                                                                                                      | Heng J, et al. 2015                                |
| <i>MdtB</i>        | CARD, Annotation | RND Efflux pump                           | Efflux               | Aminocoumarins                                                                                                                                                                     | Nagakubo S, et al. 2002                            |
| <i>MdtC</i>        | CARD, Annotation | RND Efflux pump                           | Efflux               | Aminocoumarins                                                                                                                                                                     | Nagakubo S, et al. 2002                            |
| <i>MdtF</i>        | CARD             | RND Efflux pump                           | Efflux               | Fluoroquinolones, Macrolides, Penams                                                                                                                                               | Nishino K., et al., 2002                           |
| <i>MdtP</i>        | Annotation       | MFS Efflux pump                           | Efflux               | Nucleosides                                                                                                                                                                        | Shimada T, et al. 2009                             |
| <i>MexB</i>        | CARD             | RND Efflux pump                           | Efflux               | Aminocoumarins, Carbapenems, Cephalosporins, Cephamycins, Fluoroquinolones, Macrolides, Monobactams, Penams, Penems, Peptides, Phenicol, Sulfonamides, Tetracyclines               | Welch A, et al. 2010                               |
| <i>MexDF</i>       | CARD             | RND Efflux pump                           | Efflux               | Fluoroquinolones, Phenicol                                                                                                                                                         | Kohler T, et al. 1999                              |
| <i>MexN</i>        | CARD             | RND Efflux pump                           | Efflux               | Phenicol                                                                                                                                                                           | Mima T, et al. 2009                                |
| <i>MexY</i>        | CARD             | RND Efflux pump                           | Efflux               | Aminoglycosides, Carbapenems, Cephalosporins, Cephamycins, Fluoroquinolones, Macrolides, Penams, Phenicol, Tetracyclines                                                           | Mine T, et al. 1999                                |
| <i>mphA</i>        | CARD             | Macrolide phosphotransferase              | Inactivation         | Macrolides                                                                                                                                                                         | Chesneau O, et al. 200                             |
| <i>MuxB</i>        | CARD             | RND Efflux pump                           | Efflux               | Aminocoumarins, Macrolides, Monobactams, Tetracyclines                                                                                                                             | Mima T, et al. 2009                                |
| <i>MuxC</i>        | CARD             | RND Efflux pump                           | Efflux               | Aminocoumarins, Macrolides, Monobactams, Tetracyclines                                                                                                                             | Mima T, et al. 2009                                |
| <i>oqxAB</i>       | CARD             | RND Efflux pump                           | Efflux               | Fluoroquinolones, Glycylcyclines, Tetracyclines                                                                                                                                    | Kim HB, et al. 2009                                |
| <i>PmrJ</i>        | Annotation       | PMR phosphoethanolamine transferase       | Target alteration    | Peptides                                                                                                                                                                           | Johnson, L. E., 2016                               |
| <i>PmrK</i>        | Annotation       | PMR phosphoethanolamine transferase       | Target alteration    | Peptides                                                                                                                                                                           | Johnson, L. E., 2016                               |
| <i>PmrL</i>        | Annotation       | PMR phosphoethanolamine transferase       | Target alteration    | Peptides                                                                                                                                                                           | Johnson, L. E., 2016                               |
| <i>PmrM</i>        | Annotation       | PMR phosphoethanolamine transferase       | Target alteration    | Peptides                                                                                                                                                                           | Johnson, L. E., 2016                               |
| <i>pp-cat</i>      | CARD             | Chloramphenicol acetyltransferase         | Inactivation         | Phenicol                                                                                                                                                                           | Kim E, et al. 1994                                 |
| <i>rphB</i>        | CARD             | Rifampin phosphotransferase               | Inactivation         | Rifamycins                                                                                                                                                                         | Pawlowski AC, et al. 2016                          |
| <i>smeE</i>        | CARD             | RND Efflux pump                           | Efflux               | Fluoroquinolones, Macrolides, Phenicol, Tetracyclines                                                                                                                              | Zhang L, et al. 2001                               |
| <i>suI1</i>        | CARD             | Sulfonamide resistant sul                 | Target replacement   | Sulfonamides                                                                                                                                                                       | Doi Y, et al. 2007                                 |
| <i>tet(L)</i>      | CARD             | MFS Efflux pump                           | Efflux               | Tetracyclines                                                                                                                                                                      | Roberts MC. 2005                                   |
| <i>tetR</i>        | Annotation       | MFS Efflux pump                           | Efflux               | Tetracyclines                                                                                                                                                                      | Roberts MC. 2005                                   |
| <i>ToIC</i>        | CARD, Annotation | RND, MFS and ABC efflux pumps             | Efflux               | Aminocoumarins, Aminoglycosides, Carbapenems, Cephalosporins, Cephamycin, Fluoroquinolones, Glycylcyclines, Penams, Phenicol, Rifamycins, Cephalosporins, Tetracyclines, Triclosan | Sharff A, et al. 2001                              |
| <i>vanRM</i>       | CARD             | Glycopeptide resistance                   | Target alteration    | Glycopeptides                                                                                                                                                                      | Xu X, et al. 2010                                  |
| <i>VanW</i>        | Annotation       | Glycopeptide resistance                   | Target alteration    | Glycopeptides                                                                                                                                                                      | McKessar SJ, et al. 2000                           |
| <i>VanZ</i>        | Annotation       | Glycopeptide resistance                   | Target alteration    | Glycopeptides                                                                                                                                                                      | Courvalin P. 2005                                  |
| <i>YkkCD</i>       | Annotation       | SMR Efflux pump                           | Efflux               | Aminoglycosides, Phenicol, Tetracyclines                                                                                                                                           | Jack DL, et al. 2000                               |

Resistance nodulation cell division (RND), Major facilitator superfamily (MFS), ATP-binding cassette (ABC), Small multidrug resistance (SMR)

## Supplemental Figure 1.

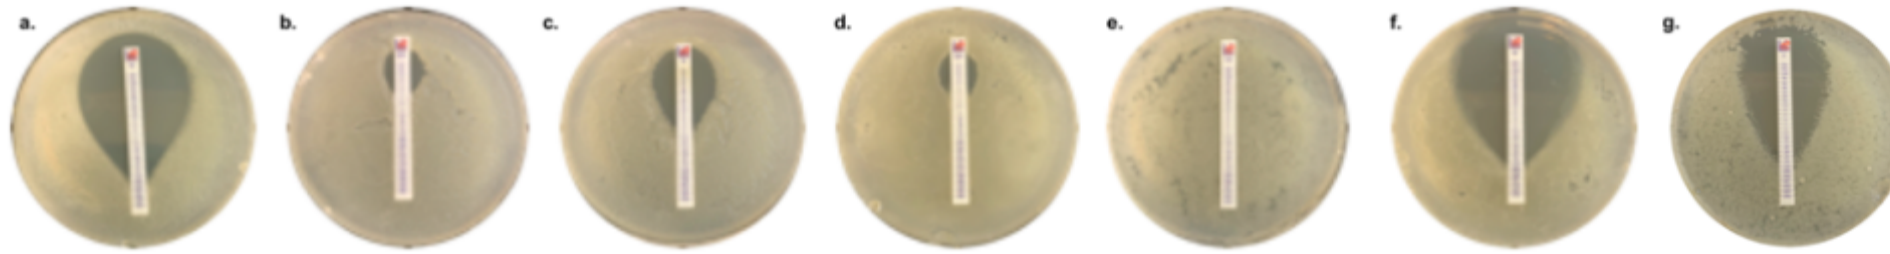

Figure S1. Selection of MIC results on Mueller Hinton agar for the *Bacillus*-based biopesticide products. **a.** *Bacillus subtilis* and cephalosporin **b.** *Bacillus subtilis* and quinupristin/dalfopristin. **c.** *Bacillus subtilis* and tetracycline. **d.** *Bacillus amyloliquefaciens* and quinupristin/dalfopristin. **e.** Bt-kurstaki-2 and ceftazidime. **f.** Bt-kurstaki-2 and cephalosporin. **g.** Bt-kurstaki-1 and erythromycin.

## Supplemental Figure 2.

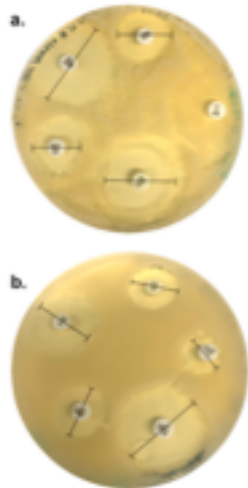

Figure S2. Selection of disk diffusion assay. **a.** Bt-kurstaki-1 with clindamycin, doxycycline, linezolid, sulfonamide/trimoxazole, and vancomycin. **b.** Bt-kurstaki-1 with clindamycin, doxycycline, linezolid, sulfonamide/trimoxazole, and vancomycin. Black bars indicate where measurement was taken.

## Supplemental Figure 3.

Comparison of Methods for Molecular Characterization by Drug Class

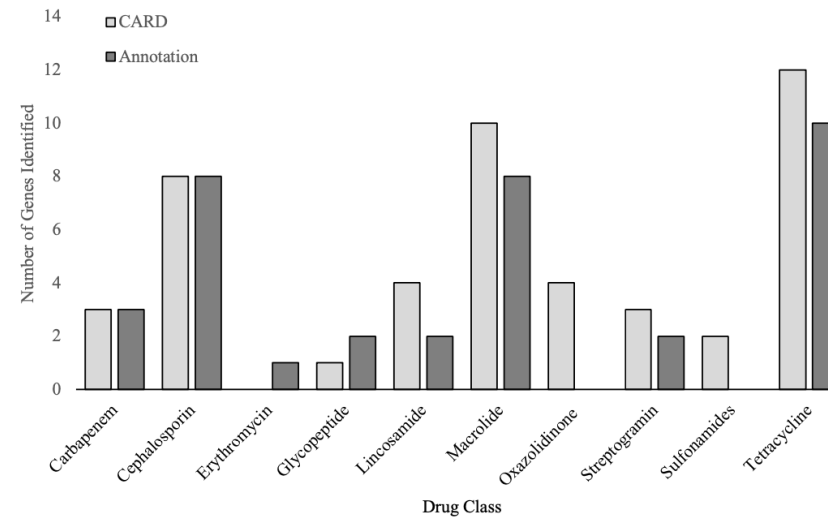

**Supplemental Figure 3** Comparison of two methods, annotation review and homologous gene matching using a curated database (CARD), to determine similarity for molecular characterization of resistance phenotype.



### Comparison of Methods for Molecular Characterization by Drug Class

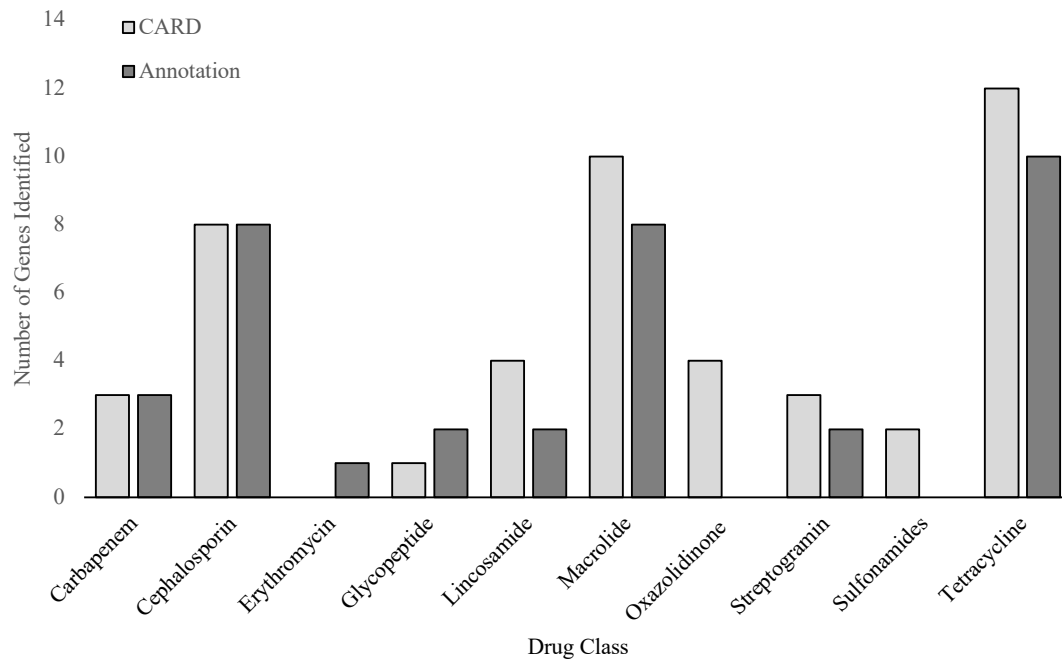

**Supplemental Figure 3** Comparison of two methods, annotation review and homologous gene matching using a curated database (CARD), to determine similarity for molecular characterization of resistance phenotype.
